# Supplementary material for: Validating the evaluation capacity scale among practitioners in non-governmental organizations
Source: Frontiers journal article supplement (doi:10.3389/fpsyg.2022.1082313), 2022-12-23
Supplement: Data_Sheet_1.PDF [file Data_Sheet_1.PDF]

## Supplementary Material

### Evaluation Capacity Scale (ECS)

Please circle the number that reflects your conditions

| <b>A</b> | <b>How much have you applied the following in your work?</b>                                                    | <i>None</i> | <i>Rather Little</i> | <i>Average</i> | <i>Rather a Lot</i> | <i>Very Much</i> |
|----------|-----------------------------------------------------------------------------------------------------------------|-------------|----------------------|----------------|---------------------|------------------|
| 1.       | Using digital storytelling techniques in sharing evidence-based practices                                       | 0           | 1                    | 2              | 3                   | 4                |
| 2.       | Avoiding ethics violations in data collection                                                                   | 0           | 1                    | 2              | 3                   | 4                |
| 3.       | Developing performance indicators for service development and monitoring                                        | 0           | 1                    | 2              | 3                   | 4                |
| 4.       | Using social media and the Internet in participant recruitment and data collection                              | 0           | 1                    | 2              | 3                   | 4                |
| 5.       | Conducting media and press interviews or conferences to build the brand, disseminate outcomes, and share impact | 0           | 1                    | 2              | 3                   | 4                |
| 6.       | Using statistics in program evaluation                                                                          | 0           | 1                    | 2              | 3                   | 4                |
| 7.       | Using public presentation skills in sharing evidence-based practices                                            | 0           | 1                    | 2              | 3                   | 4                |
| 8.       | Practicing the effectiveness-based framework of monitoring, evaluation, and learning                            | 0           | 1                    | 2              | 3                   | 4                |
| 9.       | Conducting problem analyses and needs assessments                                                               | 0           | 1                    | 2              | 3                   | 4                |
| 10.      | Using more rigorous sampling procedures for data collection                                                     | 0           | 1                    | 2              | 3                   | 4                |
| 11.      | Being confident in applying MEL knowledge and skills in your services                                           | 0           | 1                    | 2              | 3                   | 4                |
| 12.      | Sharing program evaluation knowledge with colleagues                                                            | 0           | 1                    | 2              | 3                   | 4                |
| 13.      | Appreciating program evaluation knowledge in informing service delivery                                         | 0           | 1                    | 2              | 3                   | 4                |
| 14.      | Engaging in peer learning about program evaluation                                                              | 0           | 1                    | 2              | 3                   | 4                |
| 15.      | Having an understanding of program evaluation                                                                   | 0           | 1                    | 2              | 3                   | 4                |
| 16.      | Having presentation skills in sharing program evaluation results                                                | 0           | 1                    | 2              | 3                   | 4                |
| 17.      | Having awareness of available research tools and technological resources for conducting program evaluation      | 0           | 1                    | 2              | 3                   | 4                |

| <b>B Personal Information</b>                                  |                                                                                                                                                                                                                                                                        |
|----------------------------------------------------------------|------------------------------------------------------------------------------------------------------------------------------------------------------------------------------------------------------------------------------------------------------------------------|
| 1. Age                                                         | _____ years                                                                                                                                                                                                                                                            |
| 2. Gender                                                      | 1. Male      2. Female                                                                                                                                                                                                                                                 |
| 3. What is your highest education?                             | 1. Sub-degree or diploma<br>2. Undergraduate<br>3. Master's<br>4. Doctoral                                                                                                                                                                                             |
| 4. What is your job position?                                  | 1. Social worker<br>2. Health care professional<br>3. Manager/administrator<br>4. Social entrepreneur<br>5. Therapist (e.g. occupational therapist, physiotherapist)<br>6. Others: _____                                                                               |
| 5. What is the major work area? (You may circle more than one) | 1. Children<br>2. Community<br>3. Education<br>4. Elderly<br>5. Ethnic minority/migration<br>6. Family<br>7. Labor<br>8. Medical/nursing<br>9. Offender/addict<br>10. Physical/mental problem rehabilitation<br>11. Youth<br>12. Welfare/security<br>13. Others: _____ |
